# Supplementary material for: Intranasal and Serum Gentamicin Concentration: Comparison of Three Topical Administration Protocols in Dogs
Source: MDPI journal article supplement (doi:10.3390/vetsci10080490), 2023-07-28
Supplement: s1 [file s1]

**VIDEO S1:** Procedure of nasal lavage. A healthy beagle dog was placed in ventral recumbency. The nasopharynx was manually obstructed. A 4 cm-long 12 Fr fenestrated catheter connected to a 60 mL syringe was introduced in the first third of left nasal cavity. Twenty mL ( $\pm 1$  mL/kg) of sterile isotonic saline solution were injected with the ipsilateral nostril being manually obstructed to prevent leakage of the solution. The fluid was then directly aspirated in the syringe using a manual suction while progressively removing the catheter from the nasal cavity.

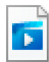

Video supporting  
information.mp4
